# Supplementary material for: Biomimetic Cascade Polymer Nanoreactors for Starvation and Photodynamic Cancer Therapy
Source: MDPI journal article supplement (doi:10.3390/molecules26185609), 2021-09-16
Supplement: s1 [file s1]

# **Biomimetic cascade polymer nanoreactors for starvation and photodynamic cancer therapy**

Shengda Liu <sup>1</sup>, Tengfei Yan <sup>1</sup>, Jianxin Sun <sup>2</sup>, Fei Li <sup>2</sup>, Jiayun Xu <sup>1</sup>, Hongcheng Sun <sup>1</sup>, Shuangjiang Yu <sup>1,\*</sup> and Junqiu Liu <sup>1,\*</sup>

1 College of Material, Chemistry and Chemical Engineering, Key Laboratory of Organosilicon Chemistry and Material Technology, Ministry of Education, Hangzhou Normal University, Hangzhou 311121, China

2 State Key Laboratory of Supramolecular Structure and Materials, College of Chemistry, Jilin University, Changchun 130012, China

\* Correspondence: yusj@hznu.edu.cn; junqiuliu@jlu.edu.cn

## Materials

4-Pyridinecarboxaldehyde, pyrrole, 6-bromohexanoic acid, methyl L-tyrosinate hydrochloride were purchased from Energy Chemical. Triethylamine (TEA) and benzotriazol-1-yloxytripyrroli-dinophosphonium hexafluorophosphate (PyBOP) were purchased from Aladdin Biochemical Technology Co., Ltd. RPMI 1640 medium, fetal bovine serum (FBS), 3-(4,5-dimethylthiazol-2-yl)-2,5-diphenyltetrazolium bromide (MTT), Hoechst 33342 staining solution, trypsin and glucose oxidase (GOx) were purchased from Meilun Biotechnology Co., Ltd. Catalase (CAT) and horseradish peroxidase (HRP) were purchased in Sigma-Aldrich. Other chemical reagents were purchased from Beijing Chemical Works Co.,Ltd.

## Synthesis of porphyrin-based building block (compound 3)

Compound 1 was produced by using 4-pyridinecarboxaldehyde and pyrrole. Then, compound 2 was prepared by modifying Compound 1 with 6-bromohexanoic acid. At last, compound 3 was obtained by modifying compound 2 with methyl L-tyrosinate hydrochloride. The synthesis route is shown in the following figure.

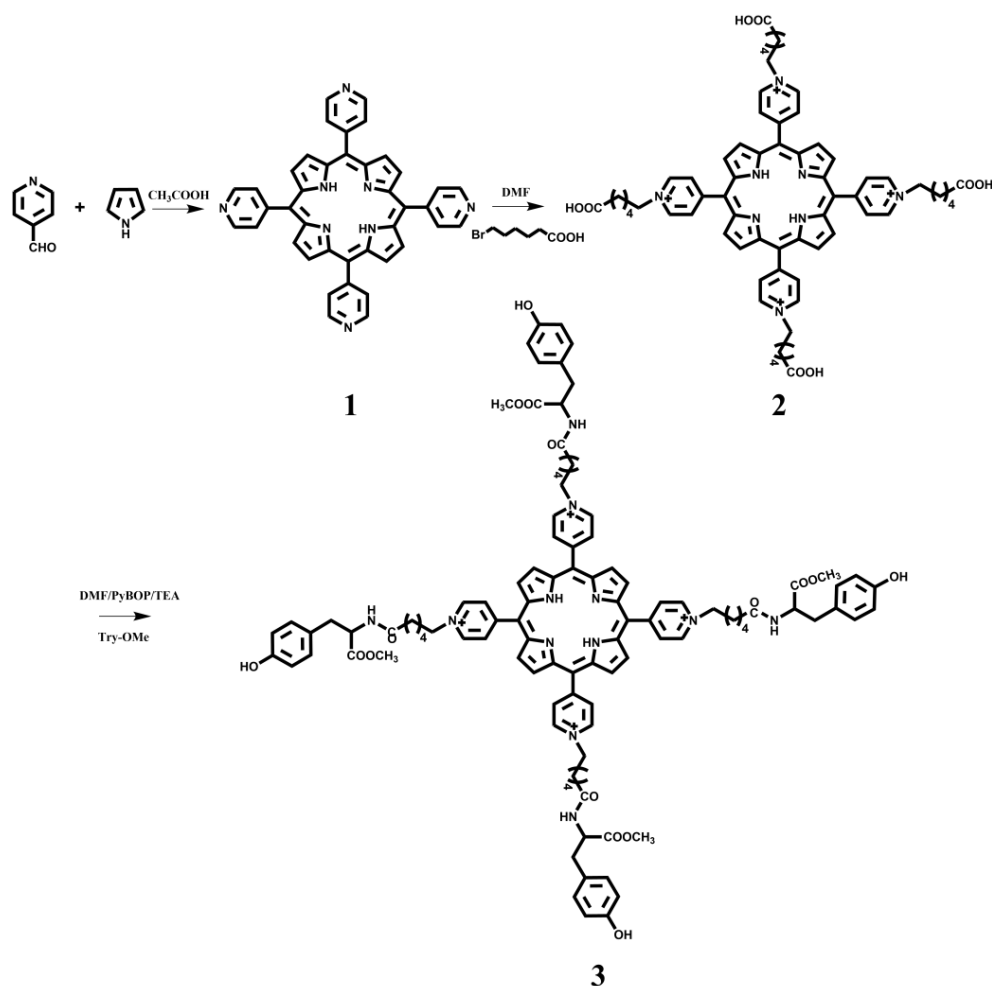

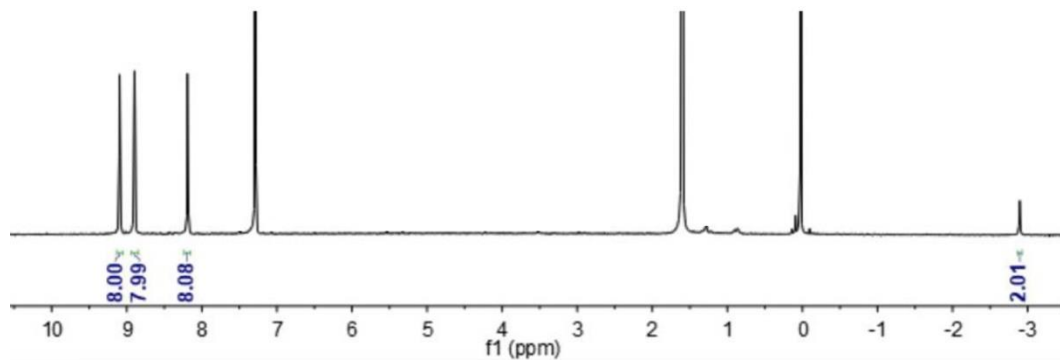

**Figure S1**  $^1\text{H}$  NMR spectrum of compound **1** in  $\text{CDCl}_3$ .

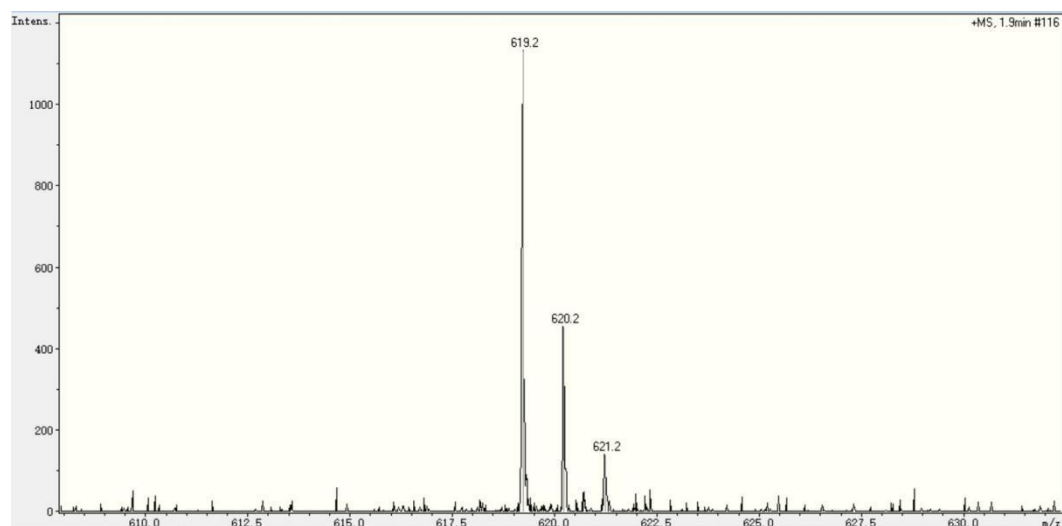

**Figure S2** ESI-MS analysis of compound **1**.

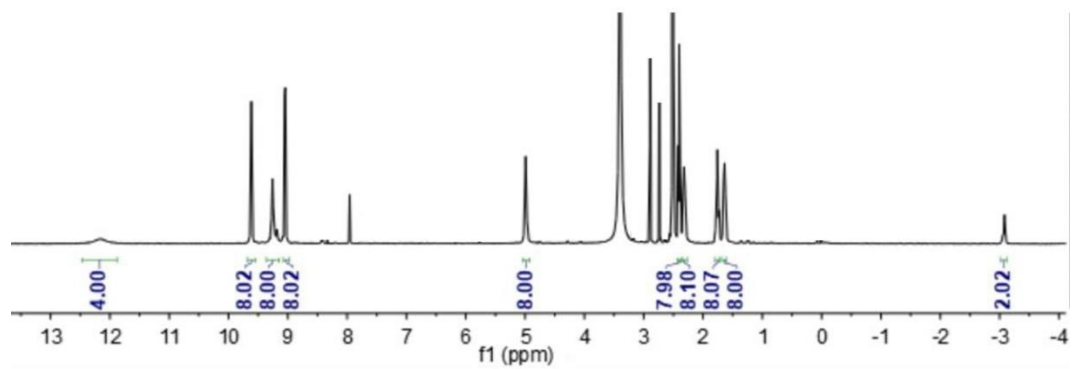

**Figure S3**  $^1\text{H}$  NMR spectrum of compound **2** in DMSO.

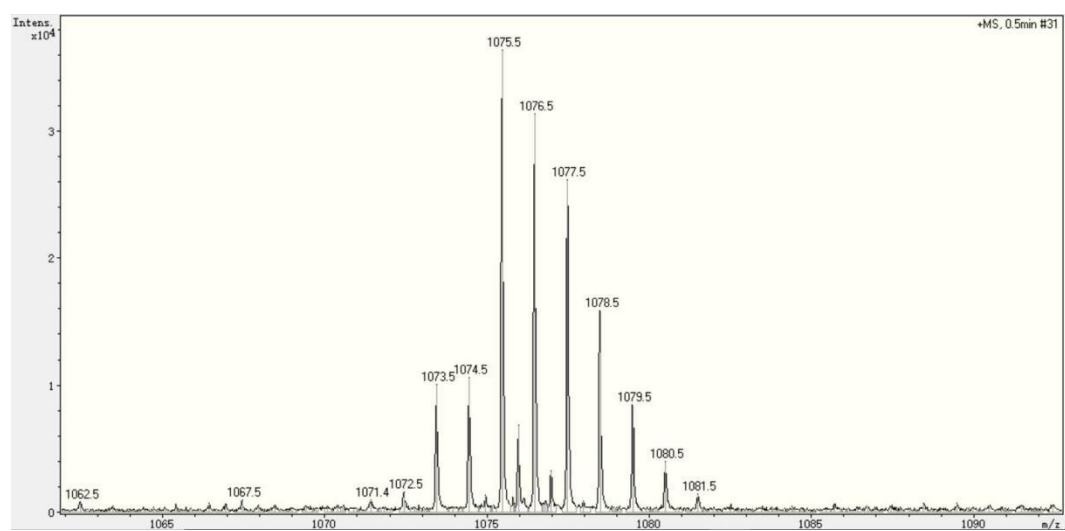

**Figure S4** ESI-MS analysis of compound **2**.

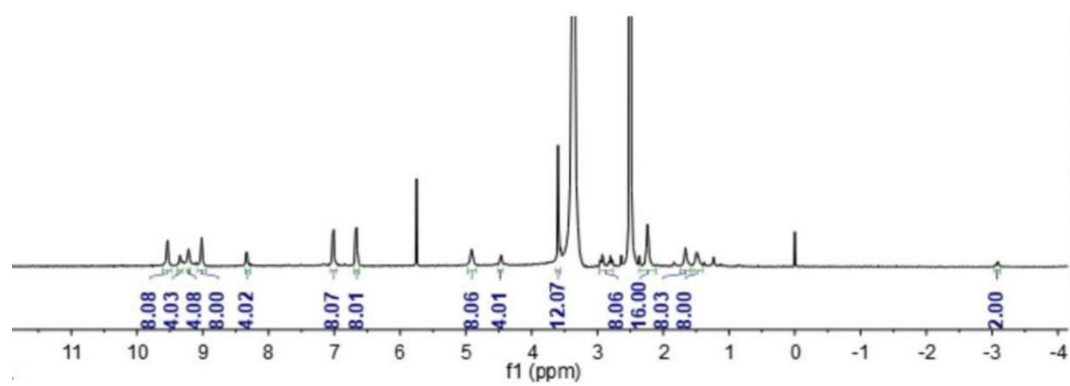

**Figure S5** <sup>1</sup>H NMR spectrum of compound **3** in DMSO.

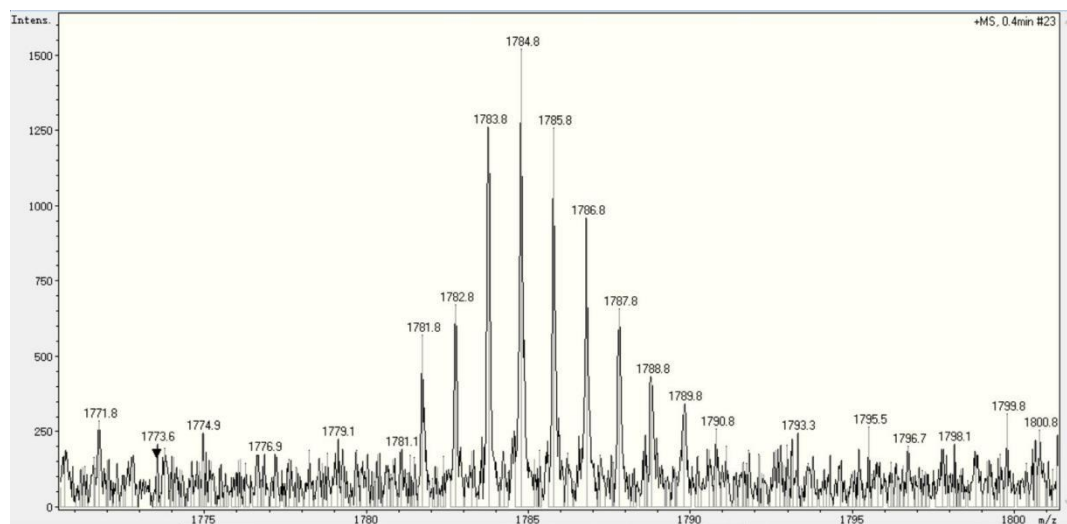

**Figure S6** ESI-MS analysis of compound **3**.

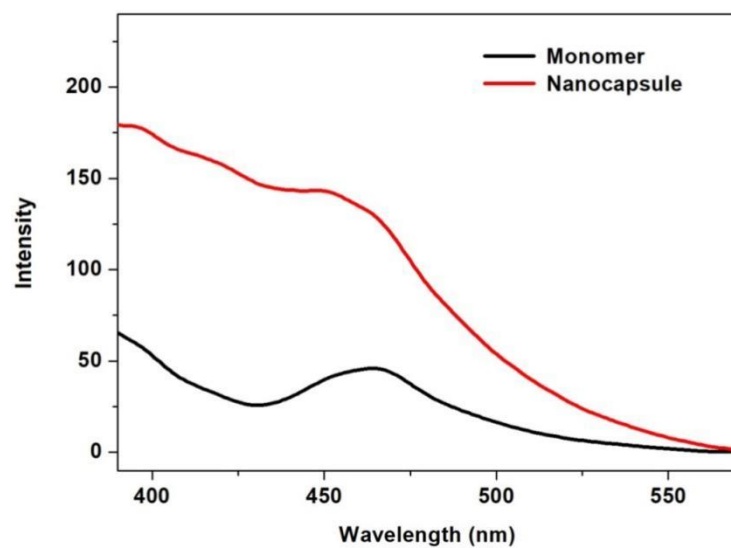

**Figure S7** Fluorescence analysis of monomer and polymer nanocapsules.

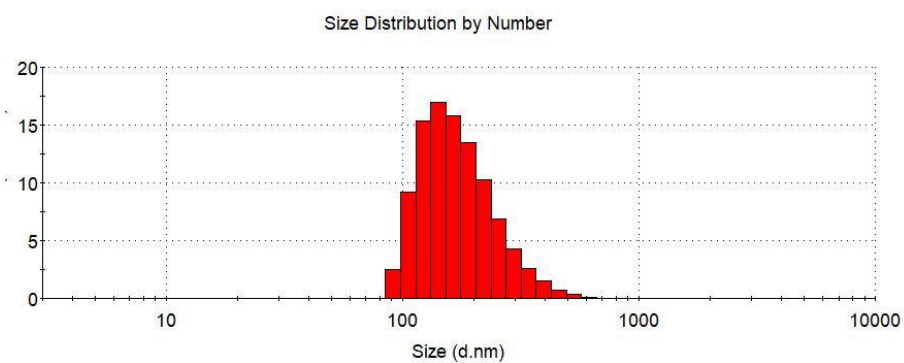

**Figure S8** Hydrodynamic sizes of the nanocapsules in aqueous solution.

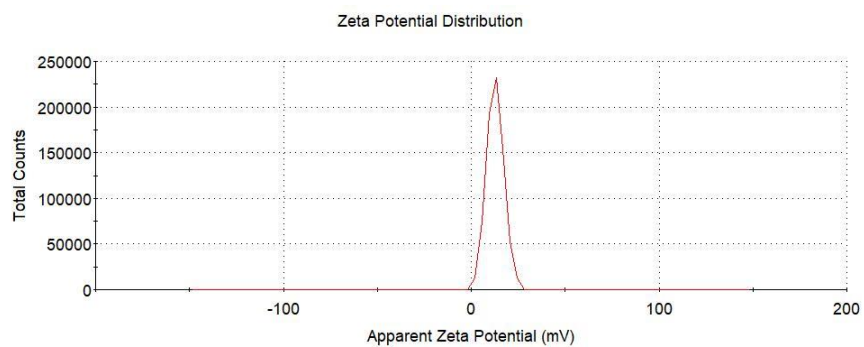

**Figure S9** Zeta potential distribution of the nanocapsules in aqueous solution.

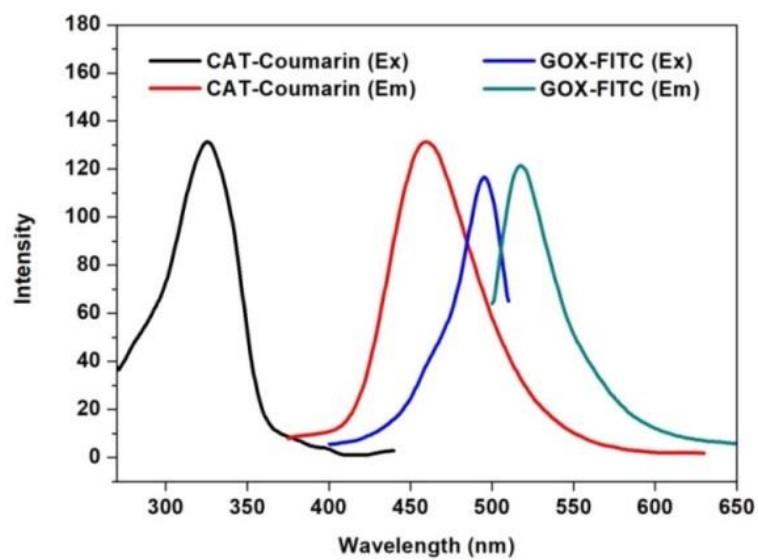

**Figure S10** Fluorescence analysis of CAT-Coumarin and GOx-FITC..

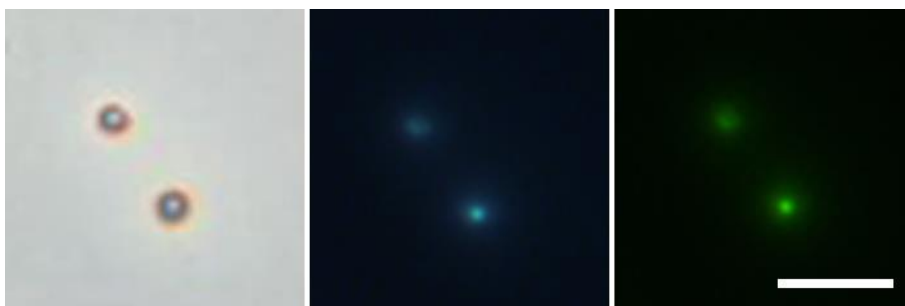

**Figure S11** Fluorescence microscopy images of nanocapsules encapsulating CAT-Coumarin and GOx-FITC.
